# Supplementary material for: Congenital Heart Disease: Growth Evaluation and Sport Activity in a Paediatric Population
Source: MDPI journal article supplement (doi:10.3390/children9060884), 2022-06-14
Supplement: s1 [file s1]

## Supplementary Material

**Table S1. Patients with comorbidities excluded to the analysis.**

| COMORBIDITY                       | N  | %     |
|-----------------------------------|----|-------|
| Isolated patent oral foramen      | 32 | 45.71 |
| Down syndrome                     | 10 | 14.29 |
| Unspecific conditions causing     | 4  | 5.71  |
| Marfan Syndrome                   | 2  | 2.86  |
| Autism                            | 2  | 2.86  |
| Noonan syndrome                   | 2  | 2.86  |
| Di George syndrome                | 2  | 2.86  |
| Turner syndrome                   | 2  | 2.86  |
| Scoliosis and Hemiparesis         | 1  | 1.43  |
| Oesophagus Atresia                | 1  | 1.43  |
| Patient on growth hormone therapy | 1  | 1.43  |
| Jacobsen syndrome                 | 1  | 1.43  |
| Chromosome 6 deletion             | 1  | 1.43  |
| Charge syndrome                   | 1  | 1.43  |
| Saethre Chtozen syndrome          | 1  | 1.43  |
| Ellis Van Creveld syndrome        | 1  | 1.43  |
| Kabuki syndrome                   | 1  | 1.43  |
| Chromosome 12p and 10q deletion   | 1  | 1.43  |
| Chromosome 4 deletion             | 1  | 1.43  |
| Thrisomy chromosome x             | 1  | 1.43  |
| Chromosome 22 deletion            | 1  | 1.43  |
| Syringomyelia                     | 1  | 1.43  |
|                                   | 70 | 100   |
